# Supplementary material for: Case report: Long-term survival with anlotinib in a metastatic parathyroid carcinoma patient harboring EGFR-sensitizing mutation
Source: Research Square preprint supplement (doi:10.21203/rs.3.rs-3141396/v1), 2023-07-10
Supplement: Supplementary file 1 [file ade2a53e1f5353f25fc111c2.xlsx]

## Sheet: Sheet1
Follow-up laboratory test results after the second surgery
Date	Parathormoe（pg/mL)	Calcium(mmol/L)	Phosphorus（mmol/L)	Potassium（mmol/L)	Sodium(mmol/L)	Chloride(mmol/L)
2017.10.10 (Before surgery )	473.8
2017.10.19 (Before surgery)	＞5000	-	-	-	-	-
2017.10.19	132.6	-	-	-	-	-
2017.10.20	85.52	2.53	-	-	-	-
2017.10.21	136.6	2.35	-	-	-	-
2017.10.22	123.2	2.37	-	-	-	-
2017.10.23	123.9	2.23	-	-	-	-
2017.10.25	103.1	2.13	-	-	-	-
2017.10.27	98.03	2.17	-	-	-	-
2017.10.28	94.48	2.19	-	-	-	-
2017.10.29	98	2.24	-	-	-	-
2017.10.30	112.9	2.18	-	-	-	-
2018.1.1	272.1	2.8	0.45	-	-	-
2018.4.11	964.9	3.15	-	4.5	136.4	102.4
2018.05.21	-	3.56	-	-	-	-
2018.05.22	-	3.52	-	-	-	-
2018.05.23	-	3.15	0.41	-	-	95.8
2018.05.24	-	3.23	0.8	3.14	134.3	94.7
2018.05.25	-	3.36	-	3.06	131.3	87.7
2018.05.26	-	3.25	0.65	3.41	-	96
2018.05.27	-	3.17	0.51	3.02	-	98.2
2018.05.28	-	3.16	0.55	3.41	-	-
2018.05.29	-	3.09	0.52	3.28	-	-
2018.05.30	1017	2.95	-	3.28	-	-
2018.07.02	1707	-	-	-	-	-
2018.07.03	-	3.29	0.64	-	-	-
2018.07.04	-	3.33	-	2.9	-	98.9
2018.07.05	-	3.48	0.8	3.12	-	-
2018.07.06	-	3.07	0.58	3.32	-	-
2018.07.06	-	3.08	-	3.2	-	-
2018.07.07	-	3.14	0.64	2.99	-	-
2018.07.08	-	2.88	0.44	3.23	-	-
2018.07.15	-	3.44	0.57	3	133.9	-
2018.07.16	-	3.29	0.44	2.93	-	-
2018.07.17	-	2.96	-	3.32	135.8	-
2018.07.18	-	3.15	-	3.38	-	-
2018.07.20	-	2.87	-	3.08	-	-
2018.07.24	-	2.77	-	-	135	-
2018.07.27	-	2.68	-	-	132.4	-
2018.08.20	844.2	2.63	0.53	3.88	137.5	103.3
2018.09.25	993.6	2.56	0.5	-	135.9	-
